# Supplementary material for: Element coding based accurate evaluation of CRISPR/Cas9 initial cleavage
Source: Royal Society of Chemistry journal article supplement (doi:10.1039/d1sc03599a), 2021-01-01

## **Supplementary Information**

### **Element Coding Based Accurate Evaluation of CRISPR/Cas9 Initial Cleavage**

Jianyu Hu,<sup>a</sup> Rui Liu,<sup>b</sup> Jing Zhou<sup>a</sup> and Yi Lv<sup>a, b \*</sup>

<sup>a</sup> Analytical & Testing Center, Sichuan University, Chengdu 610064, China.

<sup>b</sup> Key Laboratory of Green Chemistry & Technology, Ministry of Education, College of Chemistry,  
Sichuan University, Chengdu 610064, China

## **Table of Content**

**Table S1.** Oligonucleotides sequence

**Table S2.** Operating conditions of ICPMS

**Figure S1.** Isotope abundance and interferences of selected elements

**Figure S2.** Chemical structure of [La]-ntDNA

**Figure S3.** The ESI-MS results of N<sub>3</sub>-DOTA

**Figure S4.** The ESI-MS results of six N<sub>3</sub>-DOTA-[Ln]

**Figure S5.** The MADI-TOF-MS characterization of original ssDNA (blue), DOTA modified ssDNA (green) and final lanthanide labeled ssDNA (yellow), respectively.

**Figure S6.** The EDS result of EC-CRISPR probes captured by SA-MBs

**Figure S7.** Control experiment of Cas9/sgRNA concentrations and reaction temperature effect.

**Figure S8.** PAGE image of CRISPR/Cas9 cleavage products in varies Cas9/sgRNA concentrations

**Figure S9.** PAGE image of CRISPR/Cas9 cleavage products in varies temperature

**Figure S10.** PAGE image of CRISPR/Cas9 cleavage products with multiple mismatch sites

**Figure S11.** [Ln] raw concentrations of different single mismatch site

**Figure S12.** [Ln] raw concentrations of different multiple mismatch sites

**Figure S13.** [Ln] raw concentrations of initial cleavage kinetic research

**Figure S14.** sgRNA sequence design route

**Figure S15.** IVT procedure of sgRNA

**Figure S16.** calibration curves of label elements

**Figure S17.** Raw ICPMS intensity of [Ln] in Cas9 concentration research

**Figure S18.** Raw ICPMS intensity of [Ln] in reaction temperature research

**Figure S19.** Raw ICPMS intensity of [Ln] in single mismatch research

**Figure S20.** Raw ICPMS intensity of [Ln] in multiple mismatches research

**Figure S21.** Raw ICPMS intensity of [Ln] in kinetic research

**Table S1.** Oligonucleotides sequence

| Primer                                 | Sequence                                                                                                        | Modification       |
|----------------------------------------|-----------------------------------------------------------------------------------------------------------------|--------------------|
| ntDNA                                  | ATATATTAGCTCATCGGGAGAACACACACTTTTTTA<br>TGGAGTCGAGCTCG                                                          |                    |
| ntDNA-1                                | ATATATTAGCTCATCGGGAGAACACACACTTTTT/iC<br>HCHdT/ATGGAGTCGAGCTCG                                                  | Int CHCH-dT        |
| ntDNA-2                                | ATATATTAGCTCATCGGGAGAACACACACTTTTT/iCH<br>CHdT/TATGGAGTCGAGCTCG                                                 | Int CHCH-dT        |
| ntDNA-3                                | ATATATTAGCTCATCGGGAGAACACACACTTTT/iCHC<br>HdT/TTATGGAGTCGAGCTCG                                                 | Int CHCH-dT        |
| ntDNA-4                                | ATATATTAGCTCATCGGGAGAACACACACTT/iCHCH<br>dT/TTTATGGAGTCGAGCTCG                                                  | Int CHCH-dT        |
| ntDNA-5                                | ATATATTAGCTCATCGGGAGAACACACACT/iCHCHd<br>T/TTTTATGGAGTCGAGCTCG                                                  | Int CHCH-dT        |
| ntDNA-6                                | ATATATTAGCTCATCGGGAGAACACACAC/iCHCHdT<br>/TTTTATGGAGTCGAGCTCG                                                   | Int CHCH-dT        |
| biotin-tDNA-SH                         | CTCGACTCCATAAAAAAAAAGTGTGTGTTCTCCCGAT<br>GAGCTAATATAT                                                           | 3' SH C6 5' Biotin |
| sgRNA                                  | <u>GGAGAACACACACUUUUUUAGUUUUAGAGCUAGA</u><br>AAUAGCAAGUUAAAAUAAGGCUAGUCCGUUAUCA<br>CUUGAAAAGUGGCACCGAGUCGGUGCUU |                    |
| Primer 1<br>(T7 promoter<br>contained) | <u>TAATACGACTCACTATAGGGGAGAACACACACTTTT</u><br><u>TTAGTTTTAGAGCTAGAAATAGC</u>                                   |                    |
| Primer 2<br>(Reverse)                  | AAGCACCGACTCGGTGCCTCTTTTTCAAGTTGATAA<br>CGGACTAGCCTTATTTAACTTGCTATTTCTAGCTC<br>TAAAC                            |                    |
| M-1                                    | GGAGAACACACACUUUUUUCG... ..                                                                                     |                    |
| M-2                                    | GGAGAACACACACUUUUUCAG... ..                                                                                     |                    |
| M-3                                    | GGAGAACACACACUUUUCUAG... ..                                                                                     |                    |
| M-4                                    | GGAGAACACACACUUUCUAG... ..                                                                                      |                    |
| M-5                                    | GGAGAACACACACUUCUUUAG... ..                                                                                     |                    |
| M-6                                    | GGAGAACACACACUCUUUUAG... ..                                                                                     |                    |
| M-7                                    | GGAGAACACACACCUUUUUAG... ..                                                                                     |                    |
| M-8                                    | GGAGAACACACAAUUUUUUAG... ..                                                                                     |                    |
| M-9                                    | GGAGAACACACCCUUUUUUAG... ..                                                                                     |                    |
| M-10                                   | GGAGAACACAAACUUUUUUAG... ..                                                                                     |                    |

|       |                             |
|-------|-----------------------------|
| M-11  | GGAGAACACCCACUUUUUUAG... .. |
| M-12  | GGAGAACAACACUUUUUUAG... ..  |
| M-13  | GGAGAACCCACACUUUUUUAG... .. |
| M-14  | GGAGAAAACACACUUUUUUAG... .. |
| M-15  | GGAGACCACACACUUUUUUAG... .. |
| M-16  | GGAGCACACACACUUUUUUAG... .. |
| M-17  | GGACAACACACACUUUUUUAG... .. |
| M-18  | GGCGAACACACACUUUUUUAG... .. |
| M-19  | GCAGAACACACACUUUUUUAG... .. |
| <hr/> |                             |
| 19'-1 | GCAGAACACACACUUUUUUAG... .. |
| 19'-2 | GCCGAACACACACUUUUUUAG... .. |
| 19'-3 | GCCCAACACACACUUUUUUAG... .. |
| 19'-4 | GCCCCACACACACUUUUUUAG... .. |
| 18'-1 | GGCGAACACACACUUUUUUAG... .. |
| 18'-2 | GGCCAACACACACUUUUUUAG... .. |
| 18'-3 | GGCCCACACACACUUUUUUAG... .. |
| 18'-4 | GGCCCCACACACUUUUUUAG... ..  |
| 17'-1 | GGACAACACACACUUUUUUAG... .. |
| 17'-2 | GGACCACACACACUUUUUUAG... .. |
| 17'-3 | GGACCCCACACACUUUUUUAG... .. |
| 17'-4 | GGACCCAACACACUUUUUUAG... .. |
| <hr/> |                             |

**Table S2.** Operating conditions of ICPMS

| Parameters                  | Values  |
|-----------------------------|---------|
| La (m/z)                    | 138.906 |
| Ce (m/z)                    | 139.905 |
| Pr (m/z)                    | 140.907 |
| Eu (m/z)                    | 152.929 |
| Tb (m/z)                    | 158.925 |
| Ho (m/z)                    | 164.93  |
| Tm (m/z)                    | 168.934 |
| ICP RF Power (W)            | 1300    |
| Plasma Gas Flow (L/min)     | 18      |
| Auxiliary Gas Flow (L/min)  | 1.20    |
| Nebulizer Gas Flow (L/min)  | 0.94    |
| Deflector Voltage (V)       | 11.75   |
| Pulse Stage Voltage (V)     | 1050    |
| Analog Stage Voltage (V)    | 1825    |
| Sample Uptake Rate (mL/min) | 0.25    |
| Resolution                  | 2060    |
| Dwell Time ( $\mu$ s)       | 50      |
| Detecting Time (s)          | 10      |

**Figure S1.** Isotope abundance and interferences of selected elements

| Element | Isotope       | Mass           | Abundance      | Interferences |
|---------|---------------|----------------|----------------|---------------|
| La      | La 138        | 137.907        | 0.090          | 138Ba, 138Ce  |
|         | <b>La 139</b> | <b>138.906</b> | <b>99.910</b>  |               |
| Ce      | Ce 136        | 135.907        | 0.185          | 136Ba, 136Xe  |
|         | Ce 138        | 137.906        | 0.251          | 137Ba, 138La  |
|         | <b>Ce 140</b> | <b>139.905</b> | <b>88.450</b>  |               |
|         | Ce 142        | 141.909        | 11.114         | 142Nd         |
| Pr      | <b>Pr 141</b> | <b>140.907</b> | <b>100.000</b> |               |
| Eu      | Eu 151        | 150.92         | 47.810         | 135BaO        |
|         | <b>Eu 153</b> | <b>152.929</b> | <b>52.190</b>  | 137BaO        |
| Tb      | <b>Tb 159</b> | <b>158.925</b> | <b>100.000</b> | 143NdO        |
| Ho      | <b>Ho 165</b> | <b>164.93</b>  | <b>100.000</b> | 149SmO        |
| Tm      | <b>Tm169</b>  | <b>168.934</b> | <b>100.000</b> | 153EuO        |

**Figure S2.** Chemical structure of [La]-ntDNA.

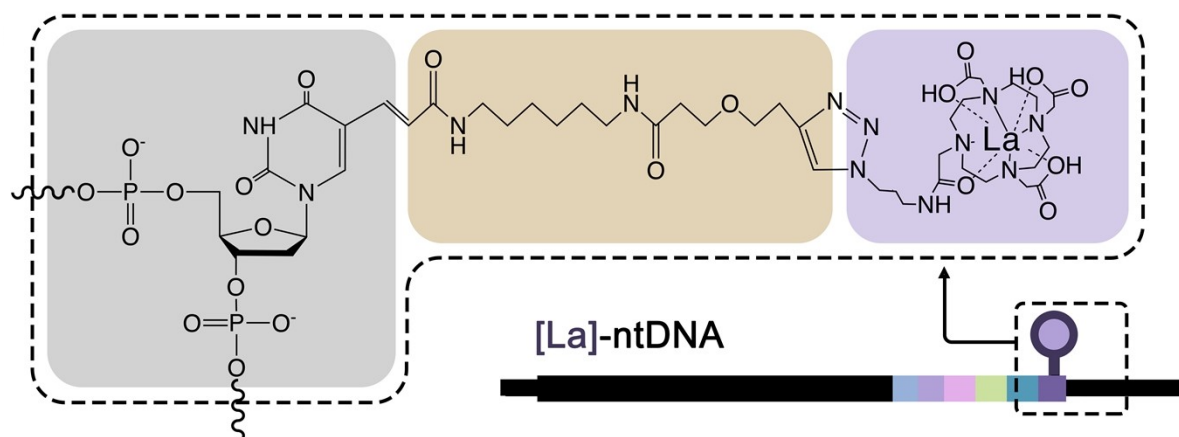

Gray part: thymine mononucleotide

Orange part: alkyne modification

Purple part: N<sub>3</sub>-DOTA-[La]

Figure S3. The ESI-MS results of N<sub>3</sub>-DOTA.

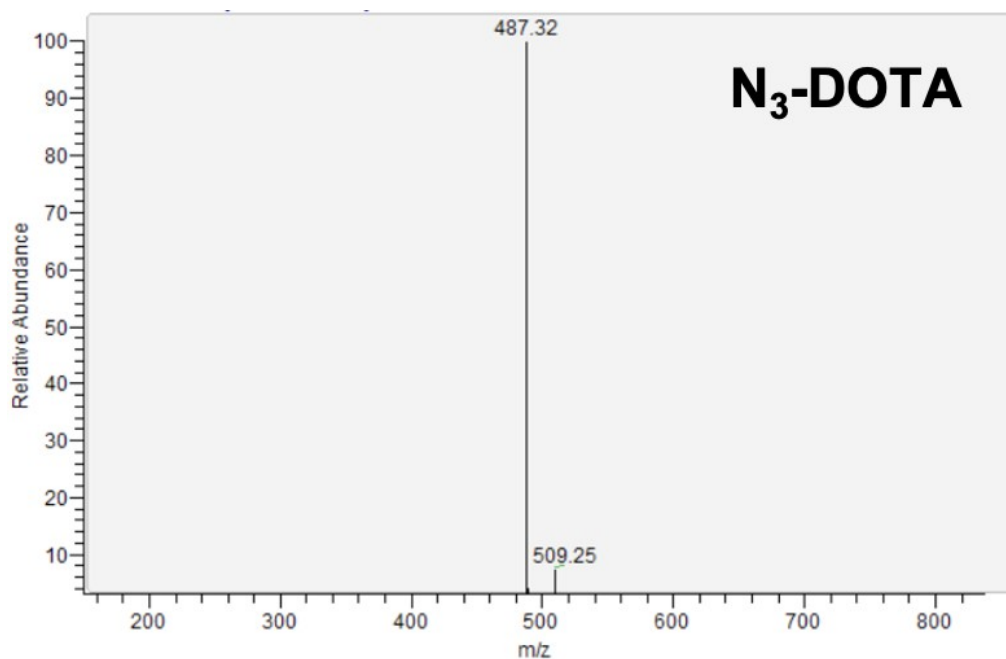

Figure S4. The ESI-MS results of six N<sub>3</sub>-DOTA-[Ln].

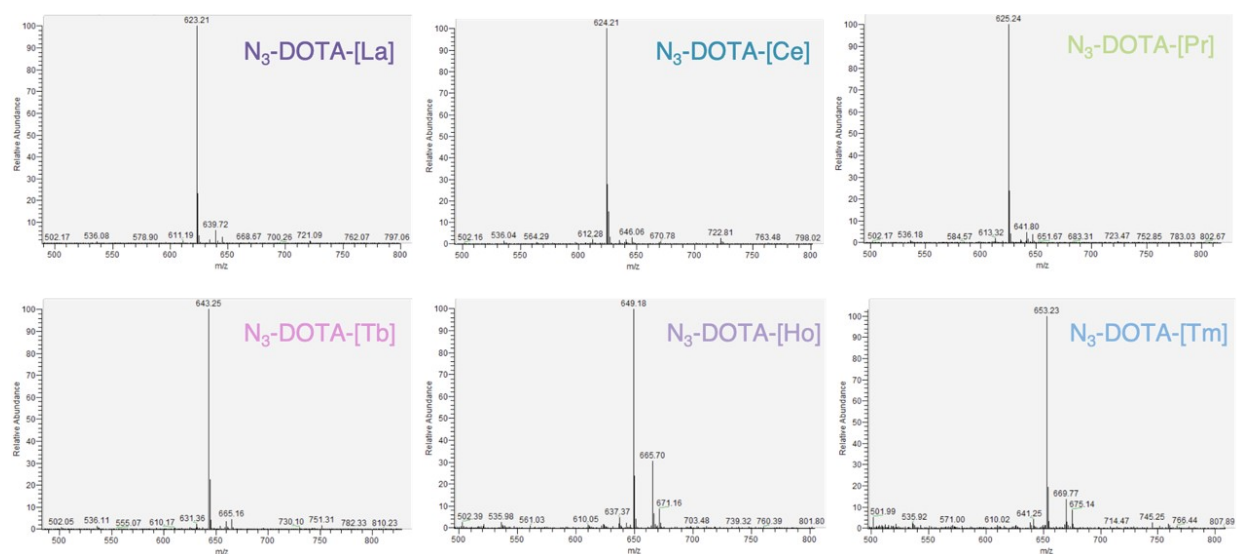

**Figure S5.** The MADI-TOF-MS characterization of original ssDNA (blue), DOTA modified ssDNA (green) and final lanthanide labeled ssDNA (yellow), respectively.

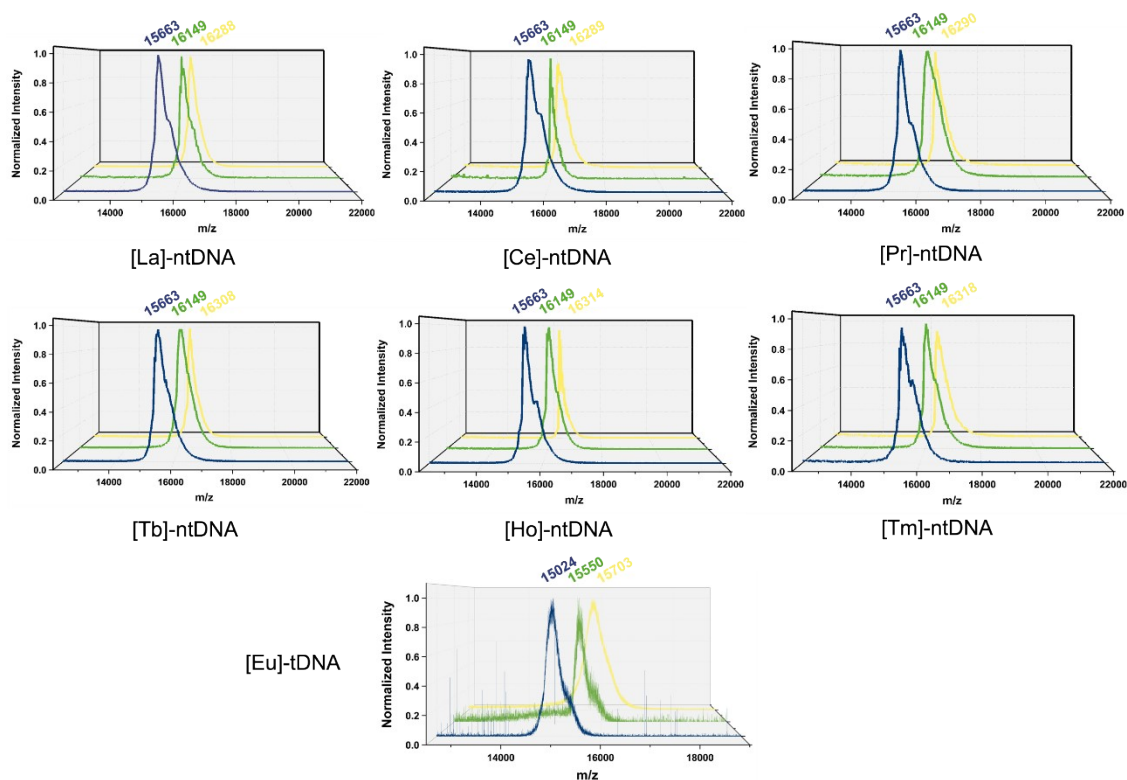

**Figure S6.** The EDS result of EC-CRISPR probes captured by SA-MBs.

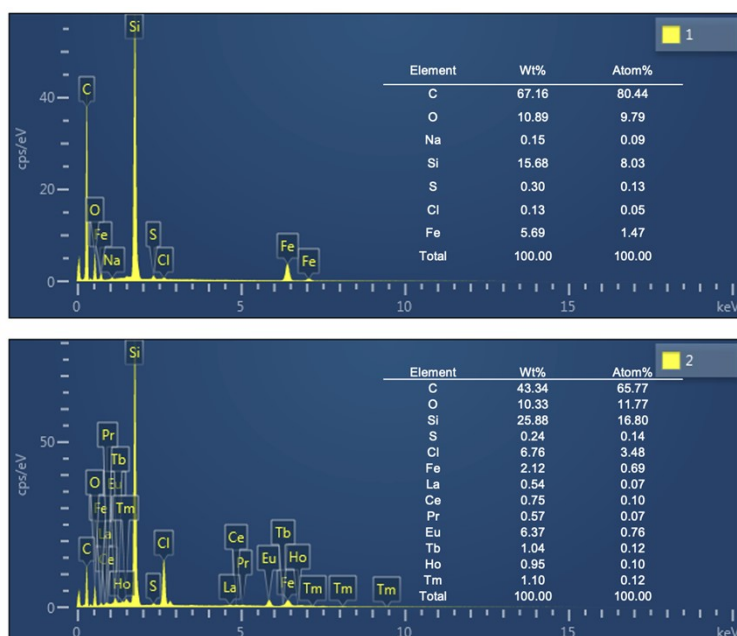

1. EDS spectrum of naked SA-MBs.
2. EDS spectrum of EC-CRISPR probes captured by SA-MBs.



Figure S7. Control experiment of Cas9/sgRNA concentrations and reaction temperature effect.

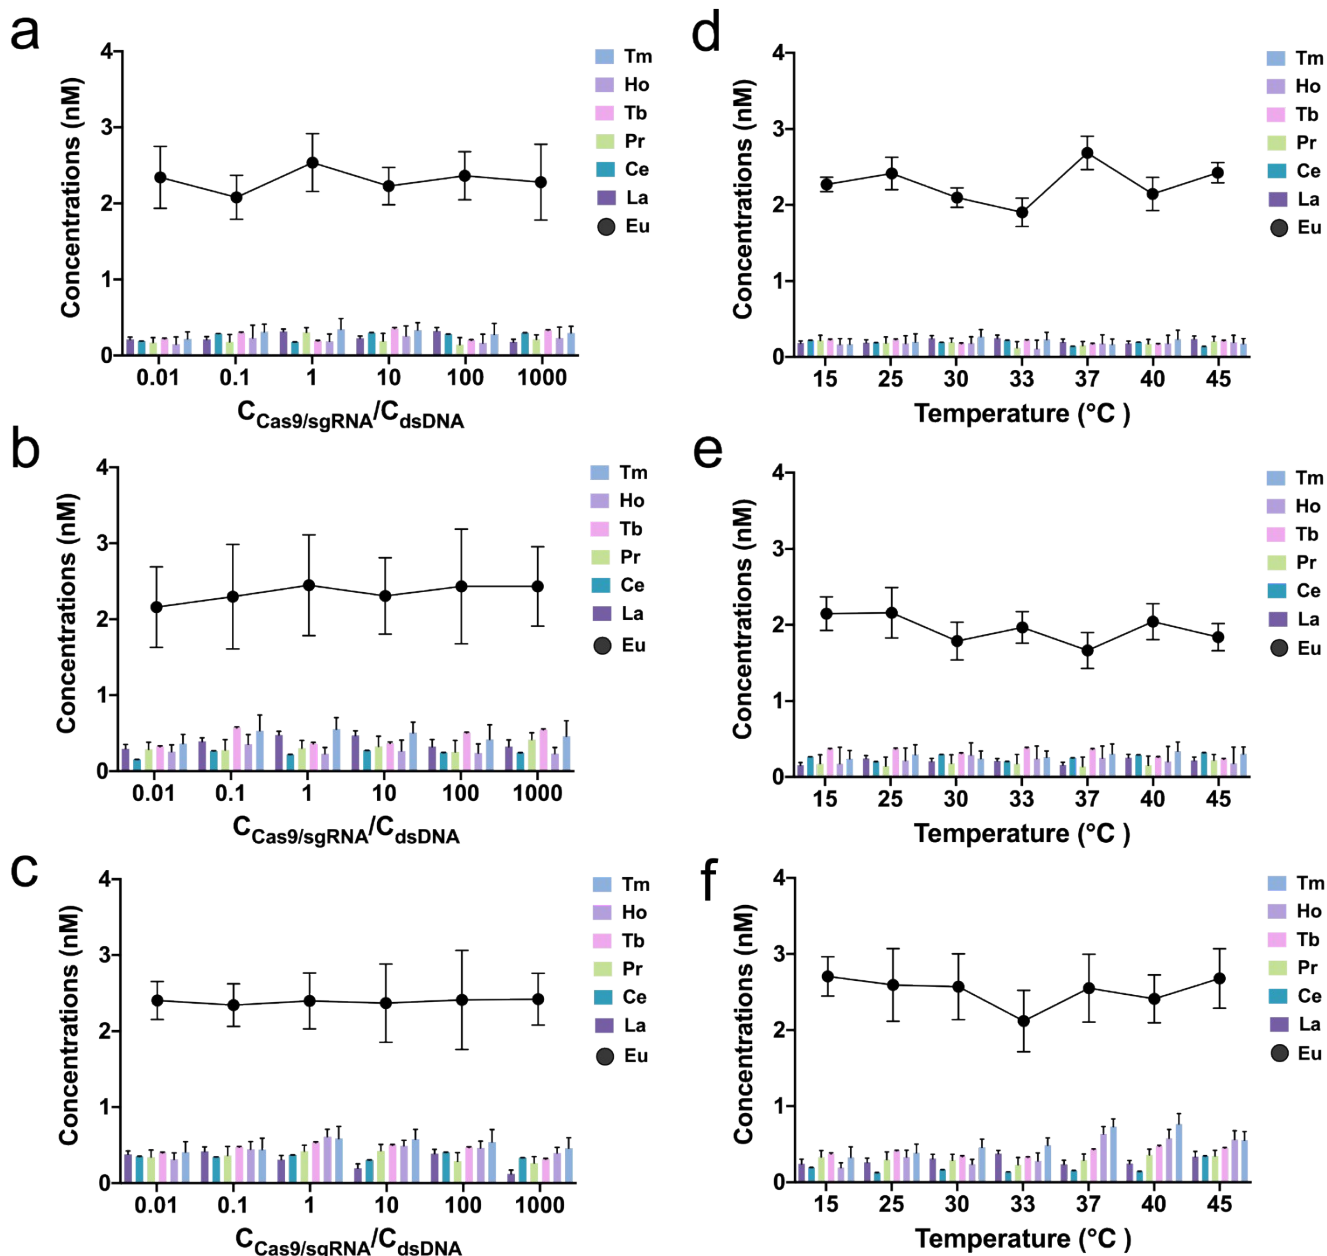

**Figure S8.** PAGE image of CRISPR/Cas9 cleavage products in varies Cas9/sgRNA concentrations.

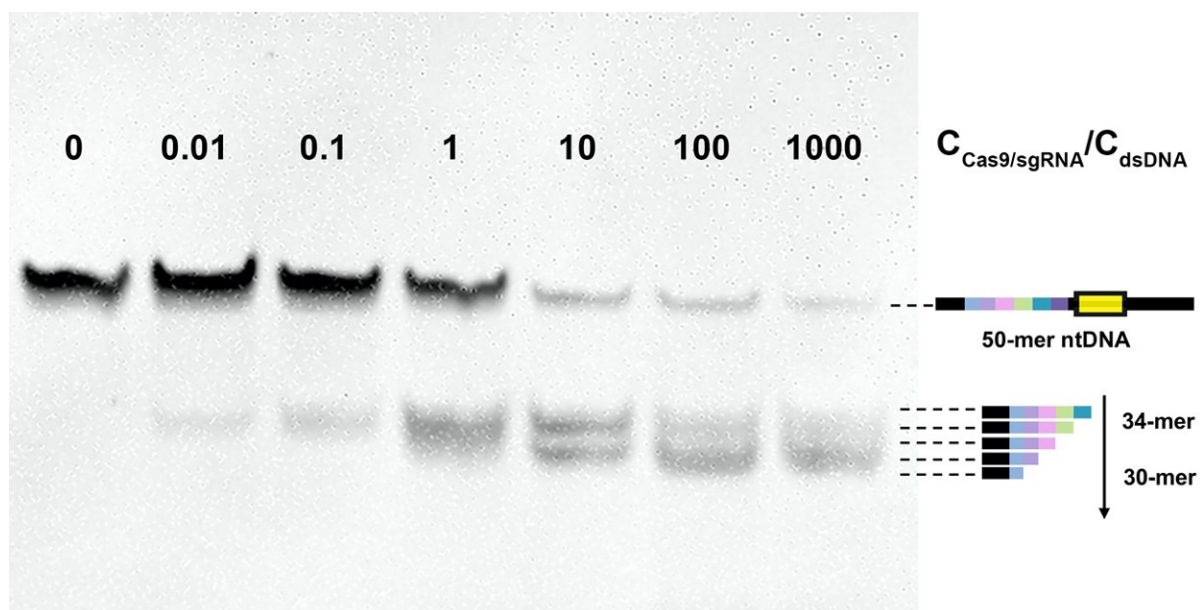

Reaction conditions: Cas9/sgRNA pre-incubated for 30 min (0.3, 3, 30, 300 nM, 3  $\mu$ M and 30  $\mu$ M), followed by introducing 30 nM mixed biotin-dsDNA substrate. Then incubated for 2h at 37  $^{\circ}$ C. 3'-terminal biotin labeled tDNA was removed by SA-MBs after heat to TM.

**Figure S9.** PAGE image of CRISPR/Cas9 cleavage products in varies temperature.

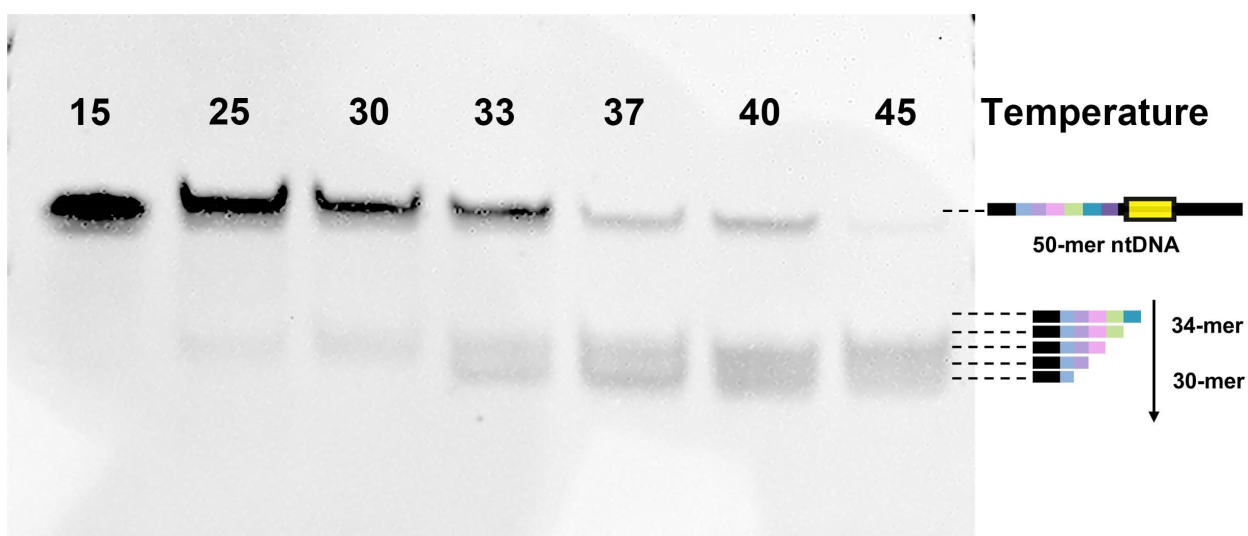

Reaction conditions: 300 nM Cas9/sgRNA pre-incubated for 30 min, followed by introducing 30 nM mixed biotin-dsDNA substrate. Then incubated for 2h at 15, 25, 30, 33, 37, 40 and 45  $^{\circ}$ C. 3'-terminal biotin labeled tDNA was removed by SA-MBs after heat to TM.

Figure S10. PAGE image of CRISPR/Cas9 cleavage products with multiple mismatches.

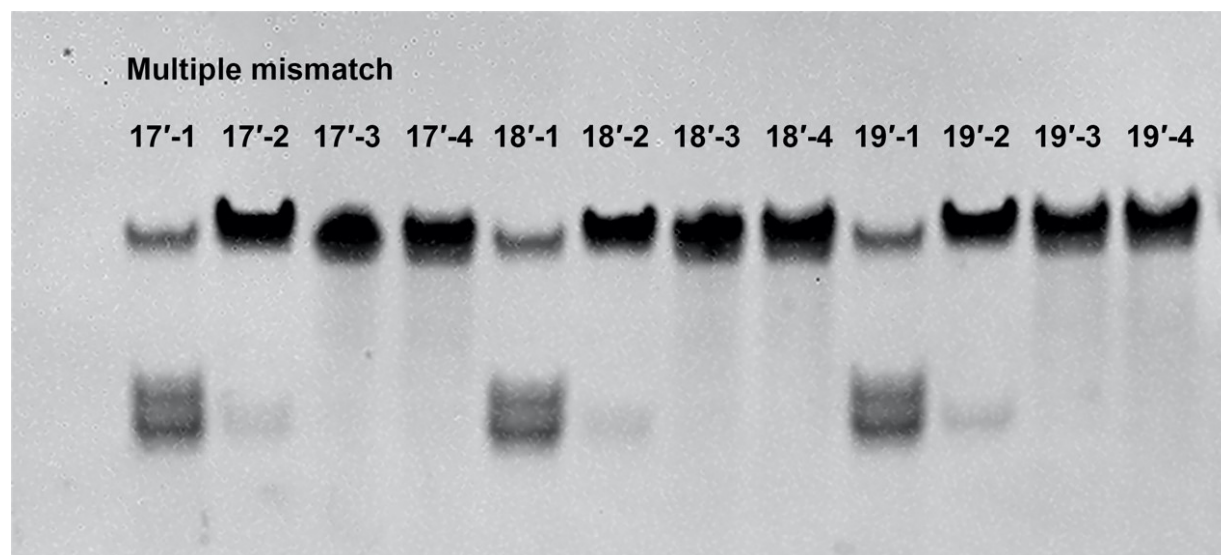

Reaction conditions: 300 nM mismatch sgRNA containing mismatch base was pre-incubated with Cas9 for 30 min, followed by introducing 30 nM mixed biotiny-dsDNA substrate. Then incubated for 2h at 37 °C. 3'-terminal biotin labeled tDNA was removed by SA-MBs after heat to TM.

Figure S11. [Ln] raw concentrations of different single mismatch site.

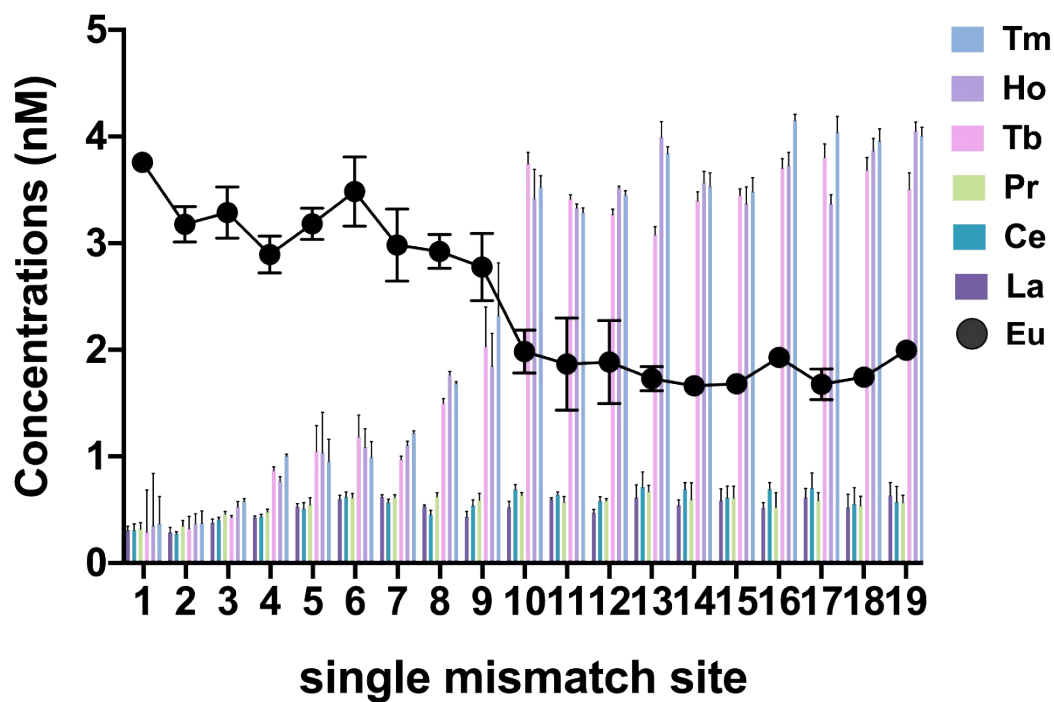

Figure S12. [Ln] raw concentrations of different multiple mismatch sites

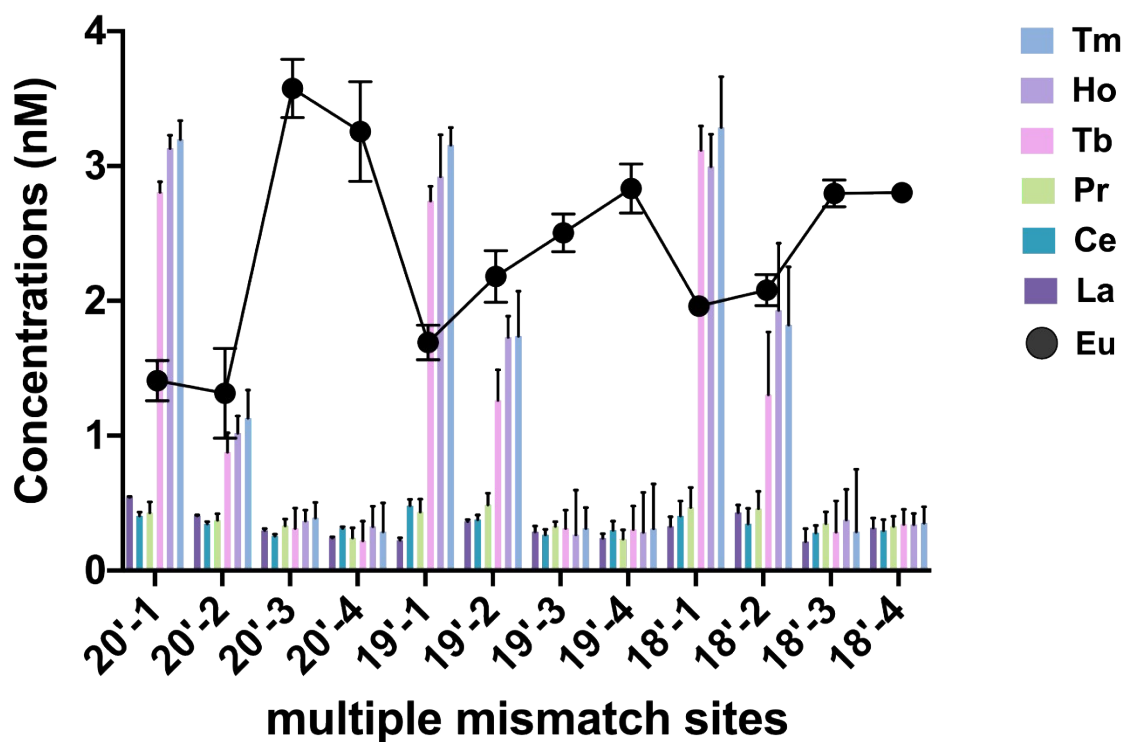

Figure S13. [Ln] raw concentrations of initial cleavage kinetic research.

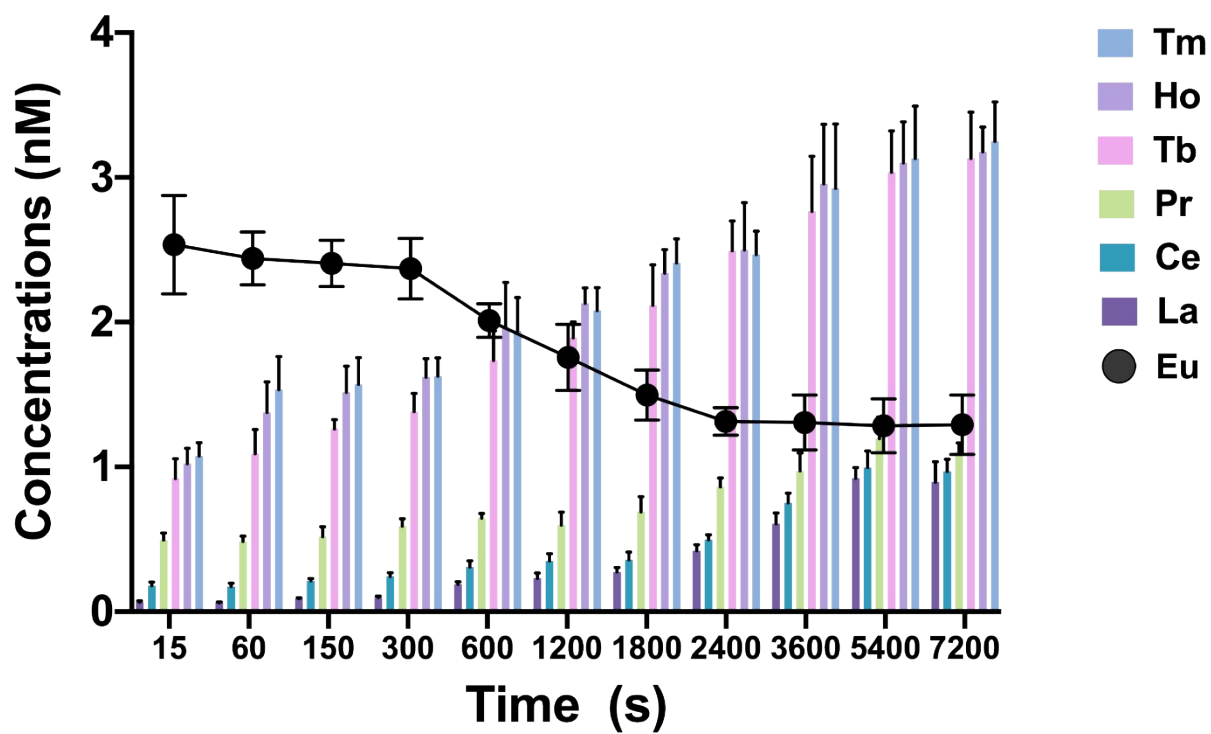

**Figure S14.** sgRNA sequence design route

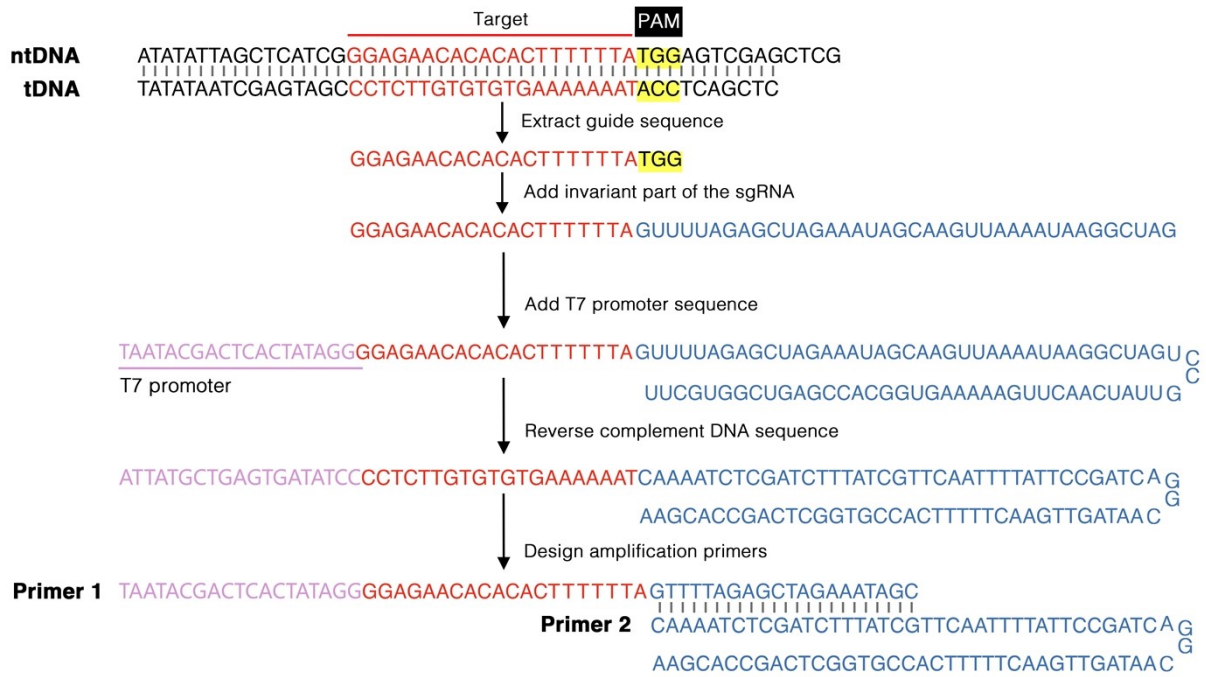

**Figure S15.** IVT procedure of sgRNA

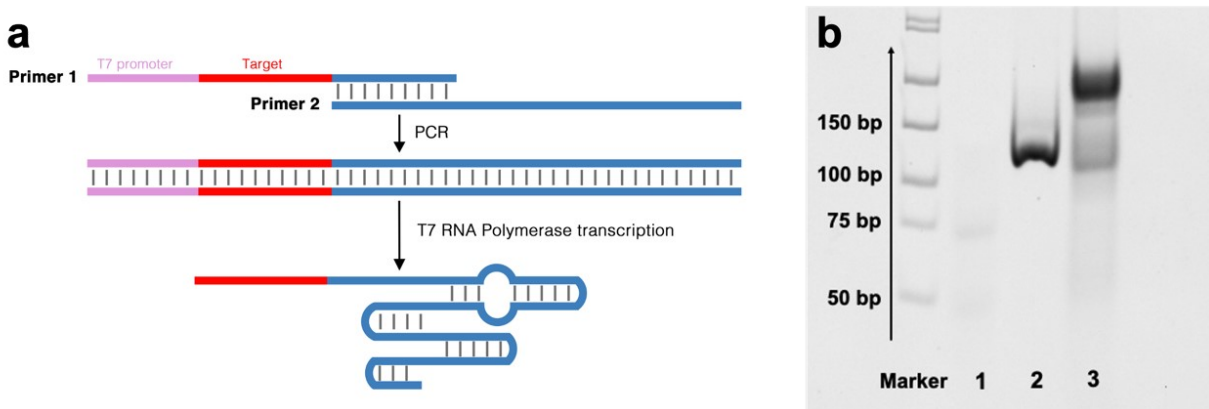

- IVT procedures, including primers PCR amplification and T7 transcription.
- Gel electrophoresis characterization of (1) two primers, (2) product of PCR amplification and (s) sgRNA product.

Figure S16. calibration curves of label elements

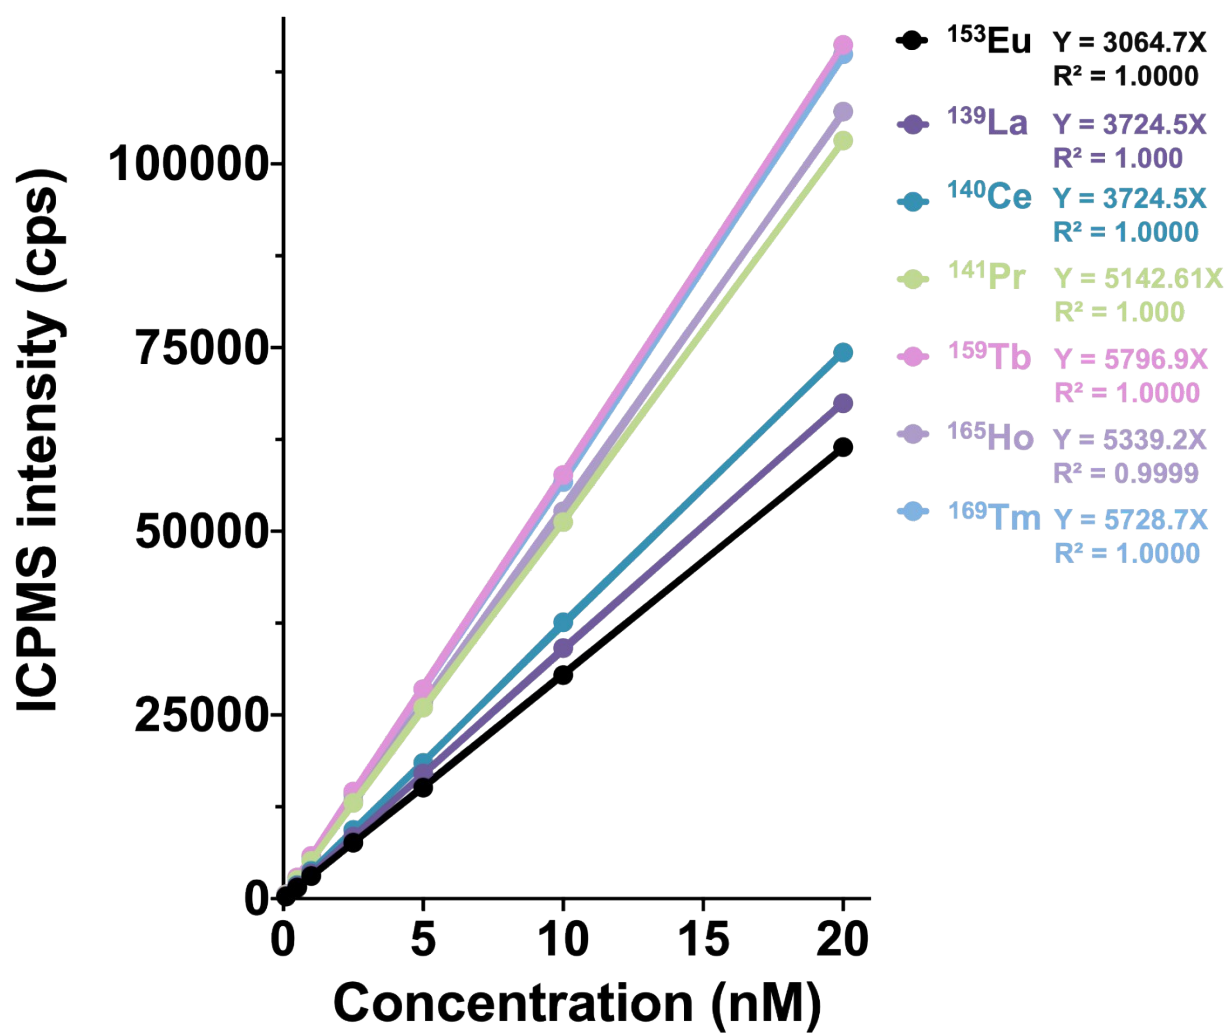

Figure S17. Raw ICPMS intensity of [Ln] in Cas9 concentration research

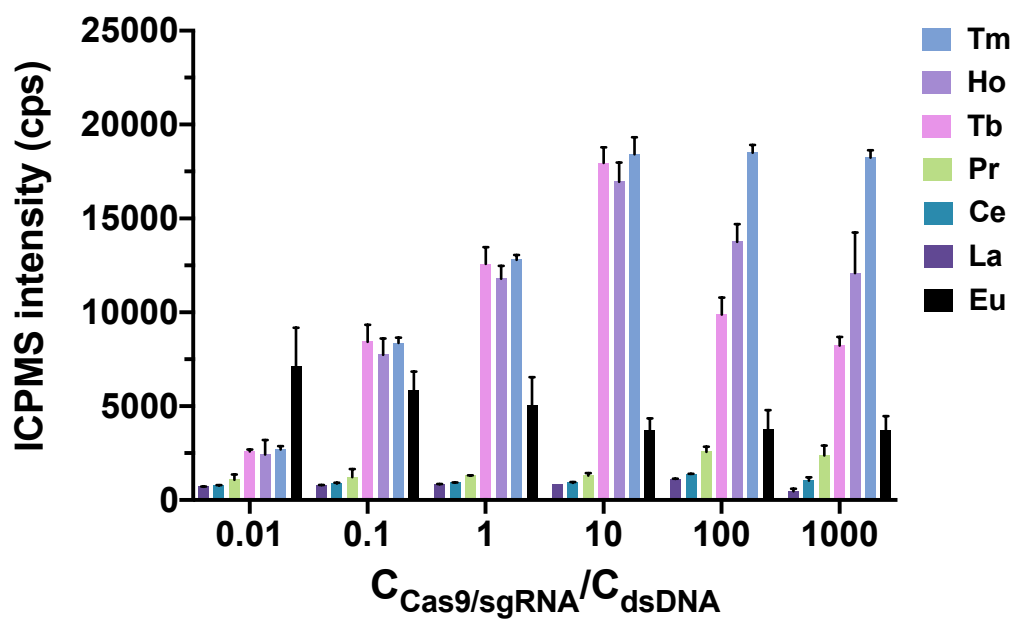

Figure S18. Raw ICPMS intensity of [Ln] in reaction temperature research

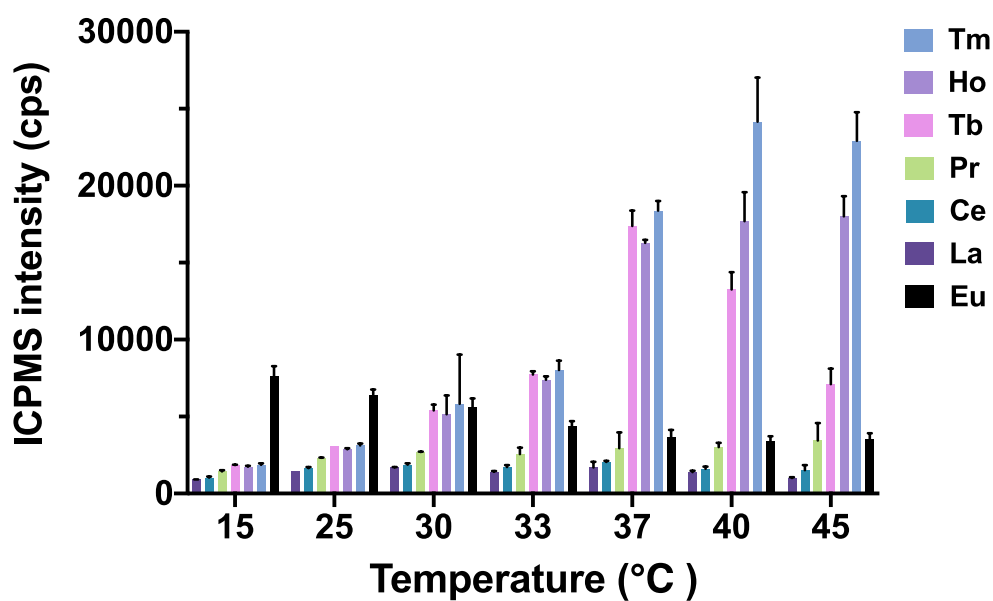

Figure S19. Raw ICPMS intensity of [Ln] in single mismatch research

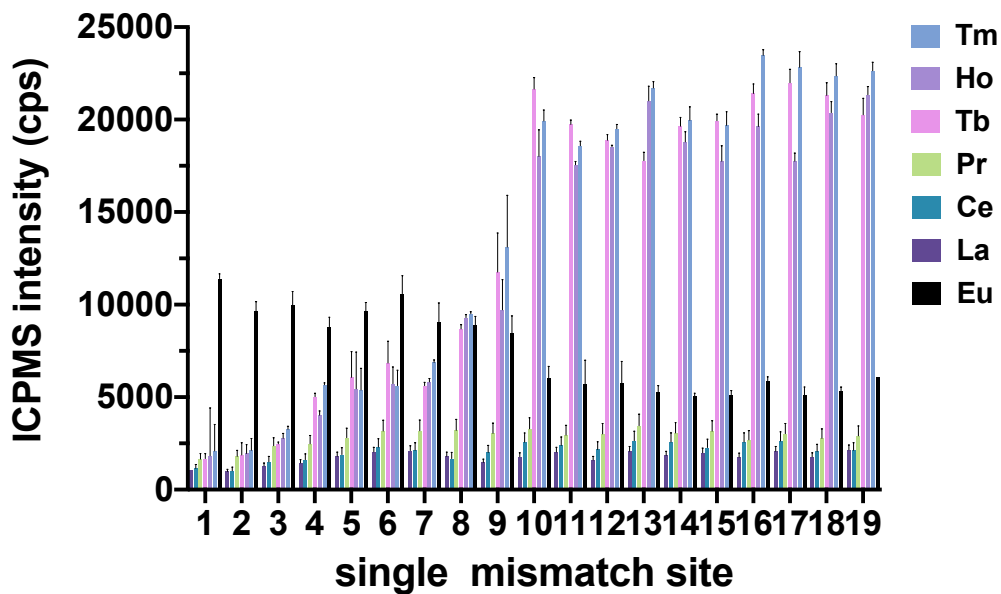

Figure S20. Raw ICPMS intensity of [Ln] in multiple mismatches research

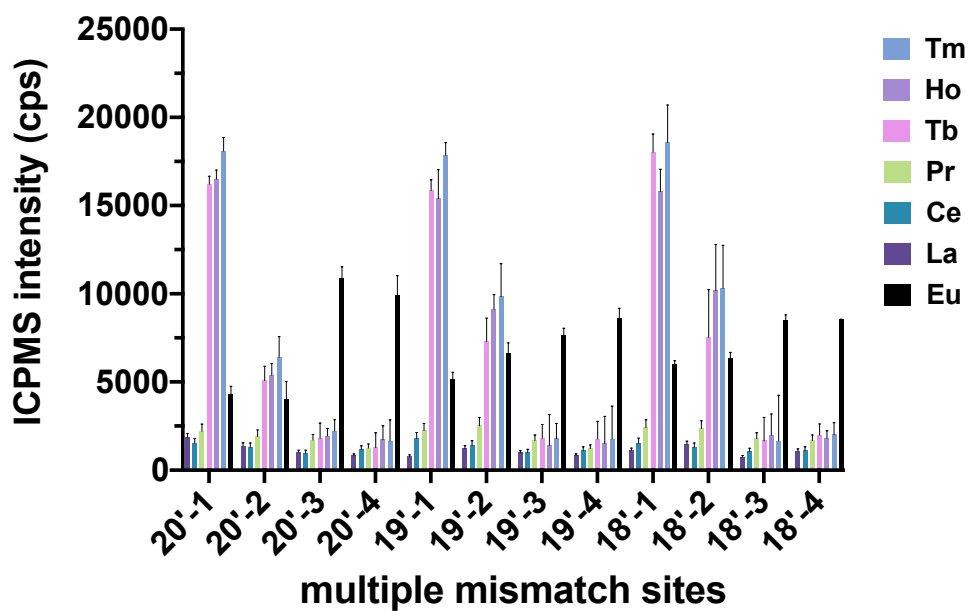



Figure S21. Raw ICPMS intensity of [Ln] in kinetic research

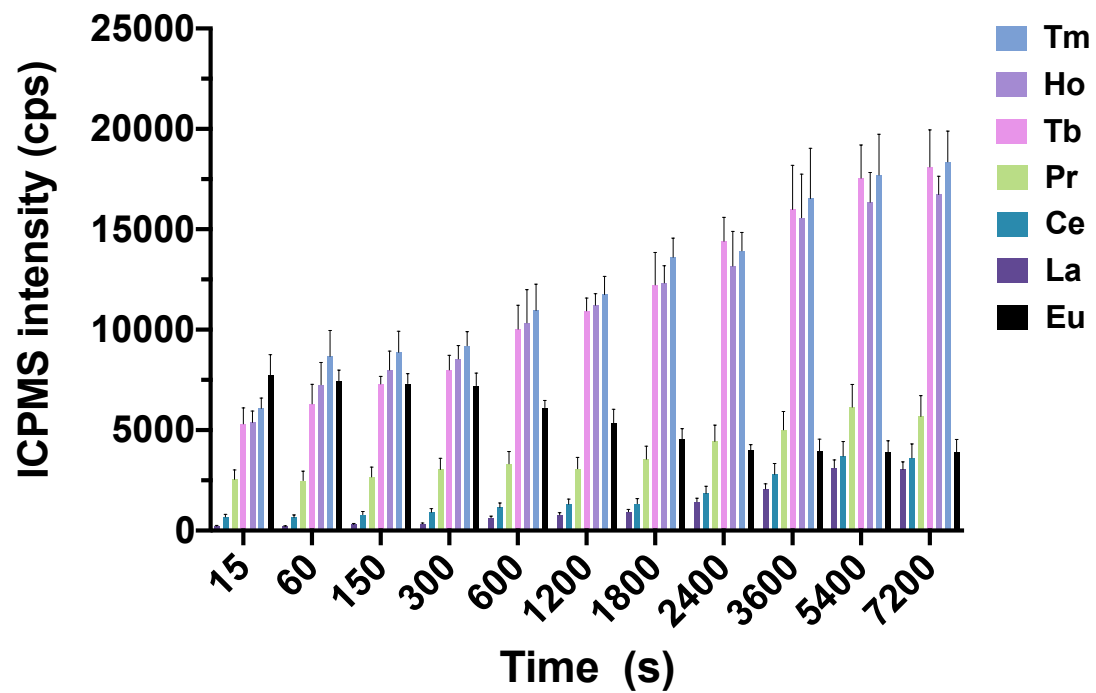

Supplement: d1sc03599a1.pdf [file d1sc03599a1.pdf]
